# Supplementary material for: Genome-wide analysis of cellulose synthase (CesA) and cellulose synthase-like (Csl) proteins in Cannabis sativa L
Source: PeerJ. 2024 Jul 31;12:e17821. doi: 10.7717/peerj.17821 (PMC11636989; doi:10.7717/peerj.17821)
Supplement: Table S1 [file peerj-12-17821-s003.xlsx]

## Sheet: TableS1
Rice Genome Annotation Project	http://rice.uga.edu/							Species		Reference genome and gene ID	web page			Arabidopsis thaliana	Locus	https://www.arabidopsis.org/
Oryza sativa	Locus							Sorghum bicolar	SbCSLJ	S.bicolor v3.1.1|Sobic.003G442500.1.p	https://phytozome-next.jgi.doe.gov/			AtCESA1	AT4G32410
OsCESA1 - cellulose synthase	LOC_Os05g08370.1							Zea mays	ZmCSLJ	Z.mays RefGen_V4|Zm00001d041972_P002	https://phytozome-next.jgi.doe.gov/			AtCESA2	AT4G39350
OsCESA2 - cellulose synthase	LOC_Os03g59340							Setaria italica	SiCSLJ1	S.italica v2.2|Seita.3G332300.1	https://phytozome-next.jgi.doe.gov/			AtCESA3	AT5G05170
OsCESA3 - cellulose synthase	LOC_Os07g24190							Setaria italica	SiCSLJ2	S.italica v2.2|Seita.3G332200.1	https://phytozome-next.jgi.doe.gov/			AtCESA4	AT5G44030
OsCESA4- cellulose synthase	LOC_Os01g54620							Solanum lycopersicum	SlCSLM1	S.lycopersicum ITAG3.2 S.lycopersicum ITAG4.0 / Solyc00g030000.1.1	https://phytozome-next.jgi.doe.gov/			AtCESA5	AT5G09870
OsCESA5 - cellulose synthase	LOC_Os03g62090							Solanum lycopersicum	SlCSLM2	S.lycopersicum ITAG3.2 S.lycopersicum ITAG4.0 / Solyc03g005450.3.1	https://phytozome-next.jgi.doe.gov/			AtCESA6	AT5G64740
OsCESA6 - cellulose synthase	LOC_Os07g14850							Solanum lycopersicum	SlCSLM3	S.lycopersicum ITAG3.2 S.lycopersicum ITAG4.0 / Solyc07g043390.3.1	https://phytozome-next.jgi.doe.gov/			AtCESA7	AT5G17420
OsCESA7- cellulose synthase	LOC_Os10g32980							Glycine max	GmCSLM1	G.max Wm82.a2.v1|Glyma.10G189300.1	https://phytozome-next.jgi.doe.gov/			AtCESA8	AT4G18780
OsCESA8 - cellulose synthase	LOC_Os07g10770							Glycine max	GmCSLM2	G.max Wm82.a2.v1|Glyma.13G174300.1	https://phytozome-next.jgi.doe.gov/			AtCESA9	AT2G21770
OsCESA9 - cellulose synthase	LOC_Os09g25490							Glycine max	GmCSLM3	G.max Wm82.a2.v1|Glyma.06G324300.1	https://phytozome-next.jgi.doe.gov/			AtCESA10	AT2G25540
OsCSLE2 - cellulose synthase-like family E	LOC_Os02g49332	XM_015769707.2												AtCSLA1	AT4G16590
OsCSLH2 - cellulose synthase-like family H	LOC_Os04g35020							Linum usitatissimum	LusCESA1	L.usitatissimum v1.0|Lus10018902	https://phytozome-next.jgi.doe.gov/			AtCSLA2	AT5G22740
OsCSLH3 - cellulose synthase-like family H	LOC_Os04g35030								LusCESA2	L.usitatissimum v1.0|Lus10006161	https://phytozome-next.jgi.doe.gov/			AtCSLA3	AT1G23480.1
OsCSLD2 - cellulose synthase-like family D	LOC_Os06g02180								LusCesa4	L.usitatissimum v1.0|Lus10008225	https://phytozome-next.jgi.doe.gov/			AtCSLA7	AT2G35650
OsCSLD5 - cellulose synthase-like family D	LOC_Os06g22980								LusCESA6	L.usitatissimum v1.0|Lus10041063	https://phytozome-next.jgi.doe.gov/			AtCSLA9	AT2G35650
OsCSLF9 - cellulose synthase-like family F	LOC_Os07g36610								LusCESA6.1	L.usitatissimum v1.0|Lus10006161	https://phytozome-next.jgi.doe.gov/			AtCSLA10	AT1G24070.1
OsCSLF8 - cellulose synthase-like family F	LOC_Os07g36630								LusCesa8	L.usitatissimum v1.0|Lus10007296	https://phytozome-next.jgi.doe.gov/			AtCSLA11	AT5G16190.4
OsCSLF2 - cellulose synthase-like family F	LOC_Os07g36690								LusCSLB1	L.usitatissimum v1.0|Lus10030035 CELLULOSE SYNTHASE-LIKE PROTEIN B1-RELATED	https://phytozome-next.jgi.doe.gov/			AtCSLA14	AT3G56000.1
OsCSLF1 - cellulose synthase-like family F	LOC_Os07g36700								LusCSLD3	L.usitatissimum v1.0|Lus10026609 CELLULOSE SYNTHASE-LIKE PROTEIN D3	https://phytozome-next.jgi.doe.gov/			AtCSLA15	AT4G13410.1
OsCSLF4 - cellulose synthase-like family F	LOC_Os07g36740								LusCSLD4.1	L.usitatissimum v1.0|Lus10026568	https://phytozome-next.jgi.doe.gov/			AtCSLB1	AT2G32610.1
OsCSLF3 - cellulose synthase-like family F	LOC_Os07g36750								LusCSLD4.2	L.usitatissimum v1.0|Lus10013851 CELLULOSE SYNTHASE-LIKE PROTEIN D4.2	https://phytozome-next.jgi.doe.gov/			AtCSLB2	AT2G32620.1
OsCSLF6 - cellulose synthase-like family F	LOC_Os08g06380								LusCSLD4.3	L.usitatissimum v1.0|Lus10022982 CELLULOSE SYNTHASE-LIKE PROTEIN D4.3	https://phytozome-next.jgi.doe.gov/			AtCSLB3	AT2G32530
OsCSLD3 - cellulose synthase-like family D	LOC_Os08g25710								LusCSLD5.1	L.usitatissimum v1.0|Lus10010024 CELLULOSE SYNTHASE-LIKE PROTEIN D5.1	https://phytozome-next.jgi.doe.gov/			AtCSLB4	AT2G32540
OsCSLE1 - cellulose synthase-like family E	LOC_Os09g30120								LusCSLD6	L.usitatissimum v1.0|Lus10002134	https://phytozome-next.jgi.doe.gov/			AtCSLB5	AT4G15290
OsCSLE6 - cellulose synthase-like family E	LOC_Os09g30130								LusCSLE1	L.usitatissimum v1.0|Lus10016625	https://phytozome-next.jgi.doe.gov/			AtCSLB6	AT4G15320.1
OsCSLH1 - cellulose synthase-like family H	LOC_Os10g20090								LusCSLG1.1	L.usitatissimum v1.0|Lus10003196	https://phytozome-next.jgi.doe.gov/			AtCSLC4	AT3G28180
OsCSLF7 - cellulose synthase-like family F	LOC_Os10g20260								LusCSLG3.1	L.usitatissimum v1.0|Lus10023057	https://phytozome-next.jgi.doe.gov/			AtCSLC5	AT4G31590
OsCSLD1 - cellulose synthase-like family D	LOC_Os10g42750								LusCSLG3.4	L.usitatissimum v1.0|Lus10023056	https://phytozome-next.jgi.doe.gov/			AtCSLC6	AT3G07330.1
OsCESA10 - cellulose synthase	LOC_Os12g29300													AtCSLC8	AT2G24630
OsCSLD4 - cellulose synthase-like family D	LOC_Os12g36890													AtCSLD1	AT2G33100.1
														AtCSLD2	AT5G16910
														AtCSLD3	AT3G03050
														AtCSLD4	AT4G38190
														AtCSLD5	AT1G02730.1
														AtCSLD6	AT1G32180.1
														AtCSLE1	AT1G55850
														AtCSLG1	AT4G24010
														AtCSLG2	AT4G24000.1
														AtCSLG3	AT4G23990.1
