# Supplementary material for: Genome-wide analysis of cellulose synthase (CesA) and cellulose synthase-like (Csl) proteins in Cannabis sativa L
Source: PeerJ. 2024 Jul 31;12:e17821. doi: 10.7717/peerj.17821 (PMC11636989; doi:10.7717/peerj.17821)
Supplement: Table S2 [file peerj-12-17821-s004.xlsx]

## Sheet: TableS2
	Name		Protein ID	Protein name	Gene	Genome	Chromosome	Chr	Start	Stop		exon
1	CsCESA1	Pink pepper	XP_030488385.1	cellulose synthase A catalytic subunit 1 [UDP-forming] [Cannabis sativa]	LOC115705245	ASM2916894v1	NC_083601.1	1	46485323	46489663	plus	2
2	CsCESA2	Pink pepper	XP_030493403.1	cellulose synthase A catalytic subunit 3 [UDP-forming] [Cannabis sativa]	LOC115709435	ASM2916894v1	NC_083603.1	3	2039958	2045430	plus	14
3	CsCESA3	Pink pepper	XP_060968580.1	cellulose synthase A catalytic subunit 8 [UDP-forming] [Cannabis sativa].	LOC115710354	ASM2916894v1	NC_083603.1	3	46381311	46400998	complement	26
4	CsCESA4	Pink pepper	XP_030498730.2	cellulose synthase A catalytic subunit 4 [UDP-forming] [Cannabis sativa]	LOC115714244	ASM2916894v1	NC_083604.1	4	81354015	81360586	plus	12
5	CsCESA5	Pink pepper	XP_030497199.2	cellulose synthase A catalytic subunit 6 [UDP-forming] [Cannabis sativa]	LOC115712921	ASM2916894v1	NC_083604.1	4	43413067	43419866	complement	14
6	CsCESA6	Pink pepper	XP_030510687.1	cellulose synthase A catalytic subunit 7 [UDP-forming] [Cannabis sativa]	LOC115725342	ASM2916894v1	NC_083606.1	6	8084787	8090309	complement	13
7	CsCESA7	Pink pepper	XP_030480065.1	cellulose synthase A catalytic subunit 1 [UDP-forming] [Cannabis sativa]	LOC115697268	ASM2916894v1	NC_083610.1	X	73074514	73082979	plus	14
8	CsCESA8	Pink pepper	XP_030492825.1	cellulose synthase A catalytic subunit 2 [UDP-forming] [Cannabis sativa]	LOC115708936	ASM2916894v1	NC_083610.1	X	44391713	44398336	plus	14
9	CsCSLA1	Pink pepper	XP_030489494.1	glucomannan 4-beta-mannosyltransferase 9 [Cannabis sativa]	LOC115706108	ASM2916894v1	NC_083601.1	1	30835042	30839394	complement	9
10	CsCSLA2	Pink pepper	XP_030503289.1	glucomannan 4-beta-mannosyltransferase 2 [Cannabis sativa]	LOC115718615	ASM2916894v1	NC_083602.1	2	2137267	2142412	complement	9
11	CsCSLA3	Pink pepper	XP_030494054.1	glucomannan 4-beta-mannosyltransferase 9 [Cannabis sativa]	LOC115709928	ASM2916894v1	NC_083603.1	3	12036431	12041518	complement	9
12	CsCSLC1	Pink pepper	XP_030498262.2	probable xyloglucan glycosyltransferase 5 [Cannabis sativa]	LOC115713923	ASM2916894v1	NC_083604.1	4	485602	489657	complement	5
13	CsCSLC2	Pink pepper	XP_030498337.2	LOW QUALITY PROTEIN: probable xyloglucan glycosyltransferase 6 [Cannabis sativa]	LOC115713980	ASM2916894v1	NC_083604.1	4	79557034	79560863	plus	5
14	CsCSLC3	Pink pepper	XP_030482841.2	xyloglucan glycosyltransferase 4 [Cannabis sativa]	LOC115699523	ASM2916894v1	NC_083608.1	4	48526085	48528984	plus	4
15	CsCSLC4	Pink pepper	XP_030497084.2	probable xyloglucan glycosyltransferase 12 [Cannabis sativa]	LOC115712832	ASM2916894v1	NC_083610.1	X	50775391	50779419	complement	6
16	CsCSLD1	Pink pepper	XP_030489836.2	LOW QUALITY PROTEIN: cellulose synthase-like protein D3 [Cannabis sativa]	LOC115706356	ASM2916894v1	NC_083601.1	1	53770567	53776017	plus	4
17	CsCSLD2	Pink pepper	XP_030500106.2	LOW QUALITY PROTEIN: cellulose synthase-like protein D2 [Cannabis sativa]	LOC115715601	ASM2916894v1	NC_083605.1	5	55307146	55312256	plus	4
18	CsCSLD3	Pink pepper	XP_030509413.2	cellulose synthase-like protein D1 [Cannabis sativa]	LOC115724096	ASM2916894v1	NC_083609.1	9	1861487	1868748	plus	6
19	CsCSLD4	Pink pepper	XP_030486131.2	LOW QUALITY PROTEIN: cellulose synthase-like protein D4 [Cannabis sativa)	LOC115702834	ASM2916894v1	NC_083610.1	X	21520406	21524369	plus	6
20	CsCSLD5	Pink pepper	XP_030487143.1	cellulose synthase-like protein D5 [Cannabis sativa]	LOC115704043	ASM2916894v1	NC_083610.1	X	11945760	11951041	complement	3
21	CsCSLE1	Pink pepper	XP_030491018.2	cellulose synthase-like protein E6 isoform X1 [Cannabis sativa]	LOC115707259	ASM2916894v1	NC_083601.1	1	43623852	43627635	plus	8
22	CsCSLE2	Pink pepper	XP_030491014.2	cellulose synthase-like protein E1 isoform X1 [Cannabis sativa]	LOC115707257	ASM2916894v1	NC_083601.1	1	43627818	43637124	plus	8
23	CsCSLE3	Pink pepper	XP_030491023.2	cellulose synthase-like protein E6 isoform X1 [Cannabis sativa]	LOC115707260	ASM2916894v1	NC_083601.1	1	43647415	43652950	plus	8
24	CsCSLE4	Pink pepper	XP_030477807.2	cellulose synthase-like protein E6 [Cannabis sativa]	LOC115694846	ASM2916894v1	NC_083606.1	6	1576805	1586146	plus	8
25	CsCSLE5	Pink pepper	XP_030478496.2	cellulose synthase-like protein E1 [Cannabis sativa]	LOC115695578	ASM2916894v1	NC_083606.1	6	1607758	1614005	plus	8
26	CsCSLG1	Pink pepper	XP_030502277.2	cellulose synthase-like protein G3 [Cannabis sativa]	LOC115717430	ASM2916894v1	NC_083605.1	5	75592959	75601098	complement	6
27	CsCSLG2	Pink pepper	XP_030500174.2	cellulose synthase-like protein G3 [Cannabis sativa]	LOC115715656	ASM2916894v1	NC_083605.1	5	75602313	75610940	complement	6
28	CsCSLB1	Pink pepper	XP_030484580.2	cellulose synthase-like protein H1 [Cannabis sativa]	LOC115701037	ASM2916894v1	NC_083608.1	8	40276171	40287631	complement	9
29	CsCSLB2	Pink pepper	XP_030481674.2	cellulose synthase-like protein H1	LOC115698677	ASM2916894v1	NC_083608.1	8	40259603	40266916	complement	9
