# Supplementary material for: Genome-wide analysis of cellulose synthase (CesA) and cellulose synthase-like (Csl) proteins in Cannabis sativa L
Source: PeerJ. 2024 Jul 31;12:e17821. doi: 10.7717/peerj.17821 (PMC11636989; doi:10.7717/peerj.17821)
Supplement: Table S3 [file peerj-12-17821-s005.xlsx]

## Sheet: TableS3
				MOTHER					FATHER
1	CESA1	JAATIP010000109.1	KAF4371645.1	Cannabis sativa cultivar Jamaican Lion ^4 isolate Mother contig71, whole genome shotgun sequence	1	CESA1	JAATIQ010000077.1	KAF4387830.1	Cannabis sativa cultivar Jamaican Lion ^4 isolate Father 80F_arrow, whole genome shotgun sequence
2	CESA2	JAATIP010000343.1	KAF4351223.1	Cannabis sativa cultivar Jamaican Lion ^4 isolate Mother contig111, whole genome shotgun sequence	2	CESA2	JAATIQ010000021.1	KAF4399751.1	Cannabis sativa cultivar Jamaican Lion ^4 isolate Father 22F_arrow, whole genome shotgun sequence
3	CESA3	JAATIP010000118.1	KAF4370417.1	Cannabis sativa cultivar Jamaican Lion ^4 isolate Mother contig1213, whole genome shotgun sequence	3	CESA3	JAATIQ010000231.1	KAF4368613.1	Cannabis sativa cultivar Jamaican Lion ^4 isolate Father 247F_arrow, whole genome shotgun sequence
4	CESA4	JAATIP010000196.1	KAF4360965.1	Cannabis sativa cultivar Jamaican Lion ^4 isolate Mother contig1972, whole genome shotgun sequence	4	CESA4	JAATIQ010000272.1	KAF4365535.1	Cannabis sativa cultivar Jamaican Lion ^4 isolate Father 254F_arrow, whole genome shotgun sequence
5	CESA5	JAATIP010000081.1	KAF4377264.1	Cannabis sativa cultivar Jamaican Lion ^4 isolate Mother contig604, whole genome shotgun sequence	5	CESA5	JAATIQ010000080.1	KAF4387046.1	Cannabis sativa cultivar Jamaican Lion ^4 isolate Father 84F_arrow, whole genome shotgun sequence
6	CESA6	JAATIP010000105.1	KAF4372386.1	Cannabis sativa cultivar Jamaican Lion ^4 isolate Mother contig1803, whole genome shotgun sequence	6	CESA6	JAATIQ010000064.1	KAF4390137.1	Cannabis sativa cultivar Jamaican Lion ^4 isolate Father 72F_arrow, whole genome shotgun sequence
7	CESA7	JAATIP010000228.1	KAF4358220.1	Cannabis sativa cultivar Jamaican Lion ^4 isolate Mother contig1093, whole genome shotgun sequence	7	CESA7	JAATIQ010000162.1	KAF4375556.1	Cannabis sativa cultivar Jamaican Lion ^4 isolate Father 177F_arrow, whole genome shotgun sequence
8	CESA8	JAATIP010000329.1	KAF4351744.1	Cannabis sativa cultivar Jamaican Lion ^4 isolate Mother contig366,whole genome shotgun sequence	8	CESA8	JAATIQ010000486.1	KAF4354105.1	Cannabis sativa cultivar Jamaican Lion ^4 isolate Father 511F_arrow, whole genome shotgun sequence
9	CESA9	JAATIP010000094.1	KAF4374799.1	Cannabis sativa cultivar Jamaican Lion ^4 isolate Mother contig1413, whole genome shotgun sequence	9	CESA9	JAATIQ010000284.1	KAF4364272.1	Cannabis sativa cultivar Jamaican Lion ^4 isolate Father 299F_arrow, whole genome shotgun sequence
10	CSLA1	JAATIP010000121.1	KAF4369915.1	Cannabis sativa cultivar Jamaican Lion ^4 isolate Mother contig472, whole genome shotgun sequence	10	CESA10	JAATIQ010000003.1	KAF4403788.1	Cannabis sativa cultivar Jamaican Lion ^4 isolate Father 2F_arrow, whole genome shotgun sequence
11	CSLA2	JAATIP010000036.1	KAF4388042.1	Cannabis sativa cultivar Jamaican Lion ^4 isolate Mother contig1160, whole genome shotgun sequence	11	CESA11	JAATIQ010000139.1	KAF4378171.1	Cannabis sativa cultivar Jamaican Lion ^4 isolate Father 154F_arrow, whole genome shotgun sequence
12	CSLA3	JAATIP010000137.1	KAF4367984.1	Cannabis sativa cultivar Jamaican Lion ^4 isolate Mother contig1450, whole genome shotgun sequence	12	CSLA1	JAATIQ010000013.1	KAF4401308.1	Cannabis sativa cultivar Jamaican Lion ^4 isolate Father 14F_arrow, whole genome shotgun sequence
13	CSLA4	JAATIP010000068.1	KAF4379687.1	Cannabis sativa cultivar Jamaican Lion ^4 isolate Mother contig850, whole genome shotgun sequence	13	CSLA2	JAATIQ010000089.1	KAF4384815.1	Cannabis sativa cultivar Jamaican Lion ^4 isolate Father 99F_arrow, whole genome shotgun sequence
14	CSLC1	JAATIP010000053.1	KAF4383142.1	Cannabis sativa cultivar Jamaican Lion ^4 isolate Mother contig1095, whole genome shotgun sequence	14	CSLA3	JAATIQ010000210.1	KAF4369942.1	Cannabis sativa cultivar Jamaican Lion ^4 isolate Father 224F_arrow, whole genome shotgun sequence
15	CSLC2	JAATIP010000236.1	KAF4357444.1	Cannabis sativa cultivar Jamaican Lion ^4 isolate Mother contig366, whole genome shotgun sequence	15	CSLA4	JAATIQ010000072.1	KAF4388654.1	Cannabis sativa cultivar Jamaican Lion ^4 isolate Father 83F_arrow, whole genome shotgun sequence
16	CSLC3	JAATIP010000084.1	KAF4376584.1	Cannabis sativa cultivar Jamaican Lion ^4 isolate Mother contig1561, whole genome shotgun sequence	16	CSLA5	JAATIQ010000004.1	KAF4403398.1	Cannabis sativa cultivar Jamaican Lion ^4 isolate Father 3F_arrow, whole genome shotgun sequence
17	CSLC4	JAATIP010000351.1	KAF4350950.1	Cannabis sativa cultivar Jamaican Lion ^4 isolate Mother contig2621, whole genome shotgun sequence	17	CSLC1	JAATIQ010000462.1	KAF4355074.1	Cannabis sativa cultivar Jamaican Lion ^4 isolate Father 472F_arrow, whole genome shotgun sequence
18	CSLD1	JAATIP010000052.1	KAF4383587.1	Cannabis sativa cultivar Jamaican Lion ^4 isolate Mother contig93, whole genome shotgun sequence	18	CSLC2	JAATIQ010000220.1	KAF4369405.1	Cannabis sativa cultivar Jamaican Lion ^4 isolate Father 241F_arrow, whole genome shotgun sequence
19	CSLD2	JAATIP010000267.1	KAF4355331.1	Cannabis sativa cultivar Jamaican Lion ^4 isolate Mother contig2425, whole genome shotgun sequence	19	CSLC3	JAATIQ010000062.1	KAF4390678.1	Cannabis sativa cultivar Jamaican Lion ^4 isolate Father 67F_arrow, whole genome shotgun sequence
20	CSLD3	JAATIP010000021.1	KAF4391747.1	Cannabis sativa cultivar Jamaican Lion ^4 isolate Mother contig971, whole genome shotgun sequence	20	CSLC4	JAATIQ010000801.1	KAF4347514.1	Cannabis sativa cultivar Jamaican Lion ^4 isolate Father 808F_arrow, whole genome shotgun sequence
21	CSLD4	JAATIP010000014.1	KAF4393353.1	Cannabis sativa cultivar Jamaican Lion ^4 isolate Mother contig856, whole genome shotgun sequence	21	CSLC5	JAATIQ010000246.1	KAF4367533.1	Cannabis sativa cultivar Jamaican Lion ^4 isolate Father 261F_arrow, whole genome shotgun sequence
22	CSLD5	JAATIP010000145.1	KAF4366994.1	Cannabis sativa cultivar Jamaican Lion ^4 isolate Mother contig749, whole genome shotgun sequence	22	CSLC6	JAATIQ010000206.1	KAF4370319.1	Cannabis sativa cultivar Jamaican Lion ^4 isolate Father 223F_arrow, whole genome shotgun sequence
23	CSLE1	JAATIP010000132.1	KAF4368809.1	Cannabis sativa cultivar Jamaican Lion ^4 isolate Mother contig1439, whole genome shotgun sequence	23	CSLD1	JAATIQ010000105.1	KAF4381961.1	Cannabis sativa cultivar Jamaican Lion ^4 isolate Father 114F_arrow, whole genome shotgun sequence
24	CSLE2	JAATIP010000185.1	KAF4362313.1	Cannabis sativa cultivar Jamaican Lion ^4 isolate Mother contig1394, whole genome shotgun sequence	24	CSLD2	JAATIQ010000281.1	KAF4364545.1	Cannabis sativa cultivar Jamaican Lion ^4 isolate Father 308F_arrow, whole genome shotgun sequence
25	CSLE3	JAATIP010000185.1	KAF4362308.1	Cannabis sativa cultivar Jamaican Lion ^4 isolate Mother contig1394, whole genome shotgun sequence.	25	CSLD3	JAATIQ010000035.1	KAF4396676.1	Cannabis sativa cultivar Jamaican Lion ^4 isolate Father 41F_arrow, whole genome shotgun sequence
26	CSLE4	JAATIP010000243.1	KAF4356971.1	Cannabis sativa cultivar Jamaican Lion ^4 isolate Mother contig1155, whole genome shotgun sequence	26	CSLD4	JAATIQ010000011.1	KAF4401739.1	Cannabis sativa cultivar Jamaican Lion ^4 isolate Father 11F_arrow, whole genome shotgun sequence
27	CSLG1	JAATIP010000299.1	KAF4353242.1	Cannabis sativa cultivar Jamaican Lion ^4 isolate Mother contig1084, whole genome shotgun sequence	27	CSLD5	JAATIQ010000247.1	KAF4367290.1	Cannabis sativa cultivar Jamaican Lion ^4 isolate Father 262F_arrow, whole genome shotgun sequence
28	CSLM	JAATIP010000157.1	KAF4365791.1	Cannabis sativa cultivar Jamaican Lion ^4 isolate Mother contig179, whole genome shotgun sequence	28	CSLD6	JAATIQ010000820.1	KAF4347318.1	Cannabis sativa cultivar Jamaican Lion ^4 isolate Father 326F_arrow, whole genome shotgun sequence
29	CSLB1	JAATIP010000054.1	KAF4382680.1	Cannabis sativa cultivar Jamaican Lion ^4 isolate Mother contig766 whole genome shotgun sequence.	29	CSLD7	JAATIQ010000364.1	KAF4359674.1	Cannabis sativa cultivar Jamaican Lion ^4 isolate Father 384F_arrow, whole genome shotgun sequence
30	CSLB2	JAATIP010000054.1	KAF4382681.1	Cannabis sativa cultivar Jamaican Lion ^4 isolate Mother contig766, whole genome shotgun sequence	30	CSLD8	JAATIQ010000290.1	KAF4363936.1	Cannabis sativa cultivar Jamaican Lion ^4 isolate Father 310F_arrow, whole genome shotgun sequence
					31	CLSE1	JAATIQ010000060.1	KAF4391296.1	Cannabis sativa cultivar Jamaican Lion ^4 isolate Father 68F_arrow, whole genome shotgun sequence
					32	CLSE2	JAATIQ010000130.1	KAF4379161.1	Cannabis sativa cultivar Jamaican Lion ^4 isolate Father 144F_arrow, whole genome shotgun sequence
					33	CLSE3	JAATIQ010000021.1	KAF4399469.1	Cannabis sativa cultivar Jamaican Lion ^4 isolate Father 22F_arrow, whole genome shotgun sequence
					34	CLSE4	JAATIQ010000012.1	KAF4401564.1	Cannabis sativa cultivar Jamaican Lion ^4 isolate Father 13F_arrow, whole genome shotgun sequence
					35	CLSE5	JAATIQ010000095.1	KAF4383862.1	Cannabis sativa cultivar Jamaican Lion ^4 isolate Father 106F_arrow, whole genome shotgun sequence
					36	CLSE6	JAATIQ010000299.1	KAF4363266.1	Cannabis sativa cultivar Jamaican Lion ^4 isolate Father 316F_arrow, whole genome shotgun sequence
					37	CSLG1	JAATIQ010000067.1	KAF4389437.1	Cannabis sativa cultivar Jamaican Lion ^4 isolate Father 76F_arrow, whole genome shotgun sequence
					38	CSLM1	JAATIQ010000728.1	KAF4348123.1	Cannabis sativa cultivar Jamaican Lion ^4 isolate Father 734F_arrow, whole genome shotgun sequence.
					39	CSLM2	JAATIQ010000120.1	KAF4380484.1	Cannabis sativa cultivar Jamaican Lion ^4 isolate Father 133F_arrow, whole genome shotgun sequence
