# Supplementary material for: Genome-wide analysis of cellulose synthase (CesA) and cellulose synthase-like (Csl) proteins in Cannabis sativa L
Source: PeerJ. 2024 Jul 31;12:e17821. doi: 10.7717/peerj.17821 (PMC11636989; doi:10.7717/peerj.17821)
Supplement: Table S4 [file peerj-12-17821-s006.xlsx]

## Sheet: TableS4
				Cannabis-Arabidopsis senteny information
CsCESA1	rna-XM_030632525.2			Cannabis sativa	ASM2916894v1	GCA_029168945.1
CsCESA2	rna-XM_030637543.2			Arabidopsis thaliana	TAIR10.1	GCA_000001735.2
CsCESA3	rna-XM_030642870.2			cannabis	cannabis	cananbis	Arabidopsis	Arabidopsis	Arabidopsis
CsCESA4	rna-XM_030641339.2			NC_083601.1	rna-XM_030633976.2	(CsCSLD1)	NC_003074.8	rna-NM_111175.3	cellulose synthase-like D3 (CSLD3)
CsCESA5	rna-XM_030654827.2			NC_083601.1	rna-XM_030633976.2	(CsCSLD1)	NC_003076.8	rna-NM_001343473.1	cellulose-synthase like D2 (CSLD2)
CsCESA6	rna-XM_030624205.2			NC_083602.1	rna-XM_030647429.2	(CsCSLA2)	NC_003076.8	rna-NM_122180.3	cellulose synthase-like A02 (CSLA02)
CsCESA7	rna-XM_030636965.2			NC_083603.1	rna-XM_030638194.2	(CsCSLA3)	NC_003076.8	rna-NM_120457.4	Nucleotide-diphospho-sugar transferases superfamily protein (ATCSLA09)
CsCSLA1	rna-XM_030632525.2			NC_083604.1	rna-XM_030641339.2	(CsCESA4)	NC_003071.7	rna-NM_127746.2	cellulose synthase A9 (CESA9)
CsCSLA2	rna-XM_030647429.2			NC_083604.1	rna-XM_030642477.2	(CsCSLC2)	NC_003074.8	rna-NM_111612.4	Cellulose-synthase-like C6 (CSLC6)
CsCSLA3	rna-XM_030638194.2			NC_083604.1	rna-XM_030641339.2	(CsCESA4)	NC_003075.7	rna-NM_120095.4	cellulose synthase A2 (CESA2)
CsCSLC1	rna-XM_030642402.2			NC_083604.1	rna-XM_030641339.2	(CsCESA4)	NC_003076.8	rna-NM_125870.3	cellulose synthase 6 (CESA6)
CsCSLC2	rna-XM_030642477.2			NC_083604.1	rna-XM_030641339.2	(CsCESA4)	NC_003076.8	rna-NM_121024.3	cellulose synthase 5 (CESA5)
CsCSLC3	rna-XM_030626981.2			NC_083605.1	rna-XM_030646417.2	(CsCSLG1)	NC_003075.7	rna-NM_118531.6	cellulose synthase like G3 (CSLG3)
CsCSLC4	rna-XM_030641224.2			NC_083610.1	rna-XM_030630271.2	(CsCSLD4)	NC_003075.7	rna-NM_119980.3	cellulose synthase like D4 (CSLD4
CsCSLD1	rna-XM_030633976.2			NC_083608.1	rna-XM_030626981.2	(CsCSLC3)	NC_003074.8	rna-NM_113737.3	Cellulose-synthase-like C4 (CSLC4)
CsCSLD2	rna-XM_030644246.2			NC_083609.1	rna-XM_030653553.2	(CsCSLD3)	NC_003071.7	rna-NM_001336422.1	cellulose synthase-like D1 (CSLD1)
CsCSLD3	rna-XM_030653553.2
CsCSLD4	rna-XM_030630271.2
CsCSLD5	rna-XM_030631283.2
CsCSLE1	rna-XM_030635158.2
CsCSLE2	rna-XM_030635154.2
CsCSLE3	rna-XM_030635163.2
CsCSLE4	rna-XM_030621947.2
CsCSLE5	rna-XM_030622636.2
CsCSLG1	rna-XM_030646417.2
CsCSLG2	rna-XM_030644314.2
CsCSLH1	rna-XM_030628720.2
CsCSLH2	rna-XM_030625814.2
