# Supplementary material for: Genome-wide analysis of cellulose synthase (CesA) and cellulose synthase-like (Csl) proteins in Cannabis sativa L
Source: PeerJ. 2024 Jul 31;12:e17821. doi: 10.7717/peerj.17821 (PMC11636989; doi:10.7717/peerj.17821)
Supplement: Table S5 [file peerj-12-17821-s007.xlsx]

## Sheet: Table S5
Table S5. qPCR primers list
Gene name	Forward qPCR primer	Reverse qPCR primer
CsCESA (XP_030488385.1)	GTC CCA GAA GAG CTT AGA GAA AC	CAG GTT GGT TGA TGG TGG AAT A
CsCESA (XP_030498730.1)	GTT TAT GTG GGT ACG GGA TGT	CCA TGA CGC CAG TCT TCT TAT
CsCESA (XP_030510687.1)	CAG AGT CCA TCC AAT GCC TTA T	TTT CCA GGC TAC ACT TCC ATA TC
CsCESA (KAF4360965.1)	GTG AAG TGT TTG TGG CTT GTC	TCG TCA GCA TAG GGA GTA GAA
CsCSLA (XP_030489494.1)	GAA GAC CTG AGA AAC GGT ACA A	CCA CAT GCA GCT CCA ATA GA
CsCSLA (KAF4403398.1)	CTC ACT GGG TCA CAT TCT TCT T	GTG ATG CTT GCT GGA GTG TA
CsCSLC (XP_030482841.2)	TCA CTA GGC TGC AGA ACA TAA A	CCA TAC ACC AGC AGT ACC ATT A
CsCSLC (KAF4350950.1)	TGT TCA AGC TAG GTG GTC TTT C	CAT TCA CTT GCT GCT CAA CTT C
CsCSLD (XP_030486131.2)	CCA CCG AGA GCA AAC GAA TA	CGT CAT CCA CCA AGT GTT CT
CsCSLD (KAF4355331.1)	CCT CCT CCT ATC TCT TCC TAC TT	CCG CTG GTA AGA AGC AAT AGA
CsCSLE (XP_030491023.2)	CCA ATG CAG AGG TTG GAA ATC	GCC TTC ACA CCA CCT CTT AT
CsCSLG (XP_030500174.2)	GTT CAG TTC CCT CAG AGA TTC C	CAG GTC CAT CTA ATC CAT CCA TAC
CsCSLG (XP_030502277.2)	CAG CTG CGG TGA CAT TAC TA	AAC GAC GTC GGA TAG GAA TAA G
CsCSLB (KAF4382681.1)	CCT CCT CCT ATC TCT TCC TAC TT	ACC ACA GCT CGC ATA GTA AAG
