# Supplementary material for: Genome-wide analysis of cellulose synthase (CesA) and cellulose synthase-like (Csl) proteins in Cannabis sativa L
Source: PeerJ. 2024 Jul 31;12:e17821. doi: 10.7717/peerj.17821 (PMC11636989; doi:10.7717/peerj.17821)
Supplement: Table S6 [file peerj-12-17821-s008.xlsx]

## Sheet: Table S6
Seq_1	Seq_2	Ka	Ks	Ka_Ks
CsCESA1	CsCESA6	0.23456741365197997	2480390177495960	0.09456875606916966
CsCESA7	CsCESA8	0.2558314096486735	1.95456e+16	0.1308892202388645
