# Supplementary material for: Genome-wide analysis of cellulose synthase (CesA) and cellulose synthase-like (Csl) proteins in Cannabis sativa L
Source: PeerJ. 2024 Jul 31;12:e17821. doi: 10.7717/peerj.17821 (PMC11636989; doi:10.7717/peerj.17821)
Supplement: Table S7 [file peerj-12-17821-s009.xlsx]

## Sheet: Table S7
TableS6. Descriptive statistics and Bonferroni multiple comparison results about plant tissues in terms of each gene
	Genes	Parts of plant	n	Mean1)	SE	SD	Minimum	Maximum	F and t-statistics	P-value
a	CsCESA (XP_030488385.1)	Flower	4	-4.7	0.95	1.9	-6.7	-2.77	3.642	0.057
		Leaf	4	-3.91	0.605	1.211	-5.41	-2.68
		Root	4	-2.72	0.859	1.718	-4	-0.25
		Stem	4	-1.09	1.02	2.04	-3.89	0.99
b	CsCESA (XP_030498730.1)	Flower	4	3.76	0.405	0.81	3.31	4.97	2.809	0.1
		Leaf	4	1.48	0.366	0.733	0.61	2.2
		Root	4	1.18	0.757	1.514	0.04	3.28
		Stem	4	2.77	0.958	1.915	0.2	4.65
c	CsCESA (XP_030510687.1)	Flower	3	3.81	1.25	2.16	1.7	6.02	2.757	0.134
		Leaf	3	0.34	0.545	0.943	-0.74	0.99
		Root	3	1.66	1.19	2.06	-0.35	3.76
		Stem	3	1.42	1.5	2.6	-1.58	2.93
d	CsCESA4 (KAF4360965.1)	Flower	3	8,02a	0.548	0.95	7	8.88	32.183	<0,010
		Leaf	3	3,03bc	0.016	0.028	3	3.05
		Root	3	3,72b	0.907	1.57	1.95	4.93
		Stem	3	0,05c	0.413	0.716	-0.69	0.74
e	CsCSLA1 (XP_030489494.1)	Flower	0	-	-	-	-	-	11.322	<0,010
		Leaf	4	0,37b	0.406	0.812	-0.4	1.51
		Root	4	1,68ab	0.573	1.146	0.1	2.79
		Stem	4	3,41a	0.377	0.753	2.59	4.36
f	CsCSLA5 (KAF4403398.1)	Flower	0	-	-	-	-	-	39.226	<0,010
		Leaf	4	0,41b	0.274	0.548	0.03	1.22
		Root	4	9,14a	0.685	1.371	7.62	10.65
		Stem	4	7,29a	1.25	2.5	5.25	10.91
g	CsCSLB2 (KAF4382681.1)	Flower	0	-	-	-	-	-	15.79	<0,010
		Leaf	4	-3,73b	0.635	1.271	-5.63	-2.9
		Root	4	1,10a	1.01	2.01	-0.9	3.34
		Stem	4	4,05a	1.1	2.21	1.02	6.01
h	CsCSLC3 (XP_030482841.2)	Flower	4	-1,88c	0.043	0.085	-1.98	-1.79	24.487	<0,010
		Leaf	4	0,34bc	0.366	0.733	-0.38	1.24
		Root	4	2,59ab	0.672	1.343	1.9	4.6
		Stem	4	3,48a	0.76	1.519	1.44	5.06
i	CsCSLC4 (KAF4350950.1)	Flower	0	-	-	-	-	-	1.768	0.249
		Leaf	4	2.72	0.441	0.882	2.02	3.98
		Root	4	2.45	0.494	0.989	1.51	3.75
		Stem	4	4	1.05	2.1	2.13	6.83
j	CsCSLD4 (XP_030486131.2)	Flower	0	-	-	-	-	-	-1.87	0.203
		Leaf	0	-	-	-	-	-
		Root	3	0.56	0.191	0.331	0.27	0.92
		Stem	4	1.76	0.886	1.773	0.19	3.85
k	CsCSLD2 (KAF4355331.1)	Flower	0	-	-	-	-	-	-2.88	0.064
		Leaf	0	-	-	-	-	-
		Root	4	2.84	0.698	1.396	1.78	4.8
		Stem	4	4.31	0.808	1.616	2.1	5.94
l	CsCSLE3 (XP_030491023.2)	Flower	0	-	-	-	-	-	13.738	0.016
		Leaf	3	-1,66b	1.08	1.87	-2.86	0.49
		Root	4	3,25ab	1.24	2.49	0.18	6.28
		Stem	4	3,98a	0.252	0.504	3.47	4.51
m	CsCSLG2 (XP_030500174.2)	Flower	0	-	-	-	-	-	11.451	<0,010
		Leaf	4	1,81b	0.089	0.179	1.55	1.95
		Root	4	5,41a	1.06	2.12	2.4	7.34
		Stem	4	6,66a	1.12	2.25	4.07	8.6
n	CsCSLG1 (XP_030502277.2)	Flower	0	-	-	-	-	-	-0.43	0.694
		Leaf	0	-	-	-	-	-
		Root	4	8.61	1.13	2.27	5.97	11.51
		Stem	4	9.23	1.22	2.44	6.38	11.85
	1) The difference between the means of two plant parts denoted in lowercase letters within the same column. is statistically significant (P<0.05)
